# Supplementary material for: Antipoliovirus Activity of the Organic Extract ofEupatorium buniifolium: Isolation of Euparin as an Active Compound
Source: Hindawi journal article supplement (doi:10.1155/2013/402364), 2013-01-01

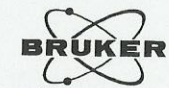

Flavo EB

Current Data Parameters  
NAME U11-041206  
EXPNO 1  
PROCNO 1

F2 - Acquisition Parameters  
Date\_ 2011-05-14  
Time 18.28  
INSTRUM Avance 500  
PROBHD 5 mm PABBI 1H/  
PULPROG zg30  
TD 65536  
SOLVENT MeOD  
NS 16  
DS 2  
SWH 7500.000 Hz  
FIDRES 0.114441 Hz  
AQ 4.3691168 sec  
RG 161  
DW 66.667 usec  
DE 6.00 usec  
TE 298.1 K  
D1 1.00000000 sec  
TD0 1

==== CHANNEL f1 =====  
NUC1 1H  
P1 7.00 usec  
PL1 0 dB  
PL1W 37.67829514 W  
SFO1 500.1327507 MHz

F2 - Processing parameters  
SI 32768  
SF 500.1300000 MHz  
WDW EM  
SSB 0  
LB 0.10 Hz  
GB 0  
PC 1.00

Unit  
Axis

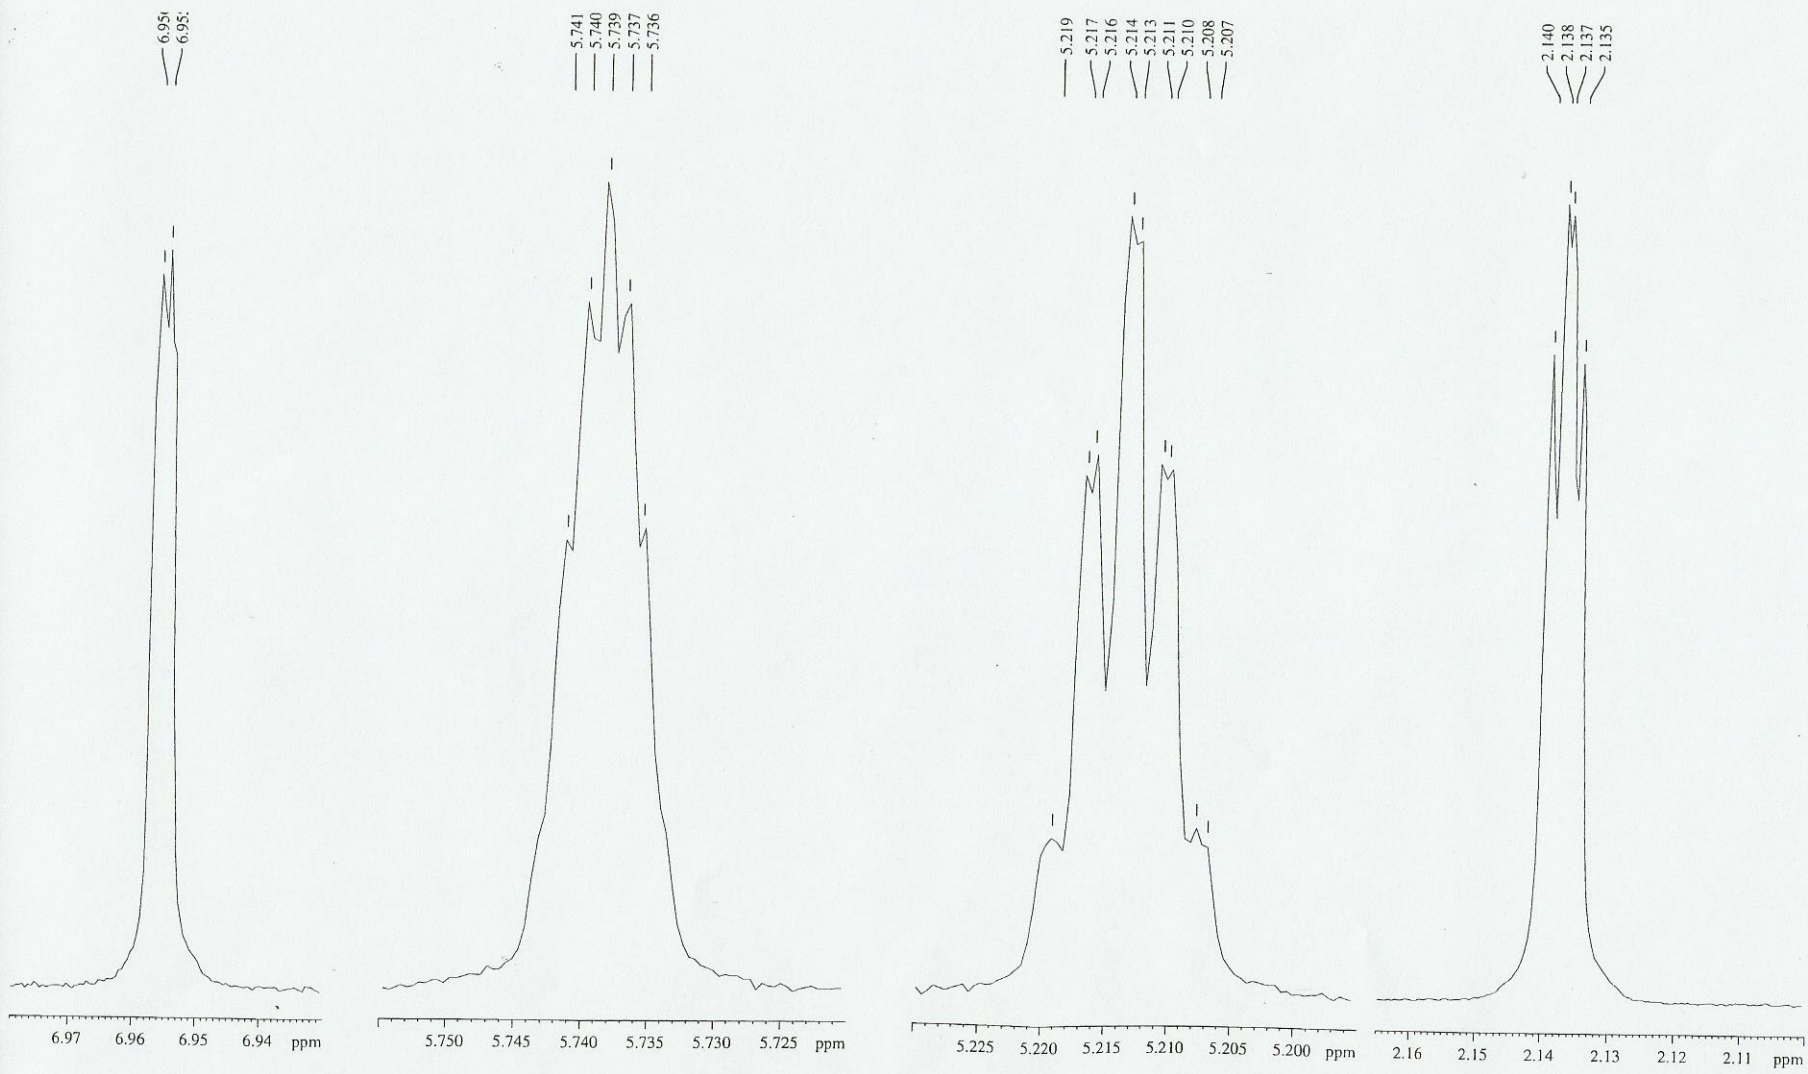

Supplement: f1 [file 402364.f1.pdf]
