# Supplementary material for: Antipoliovirus Activity of the Organic Extract ofEupatorium buniifolium: Isolation of Euparin as an Active Compound
Source: Hindawi journal article supplement (doi:10.1155/2013/402364), 2013-01-01
Supplement: f2 [file 402364.f2.pdf]

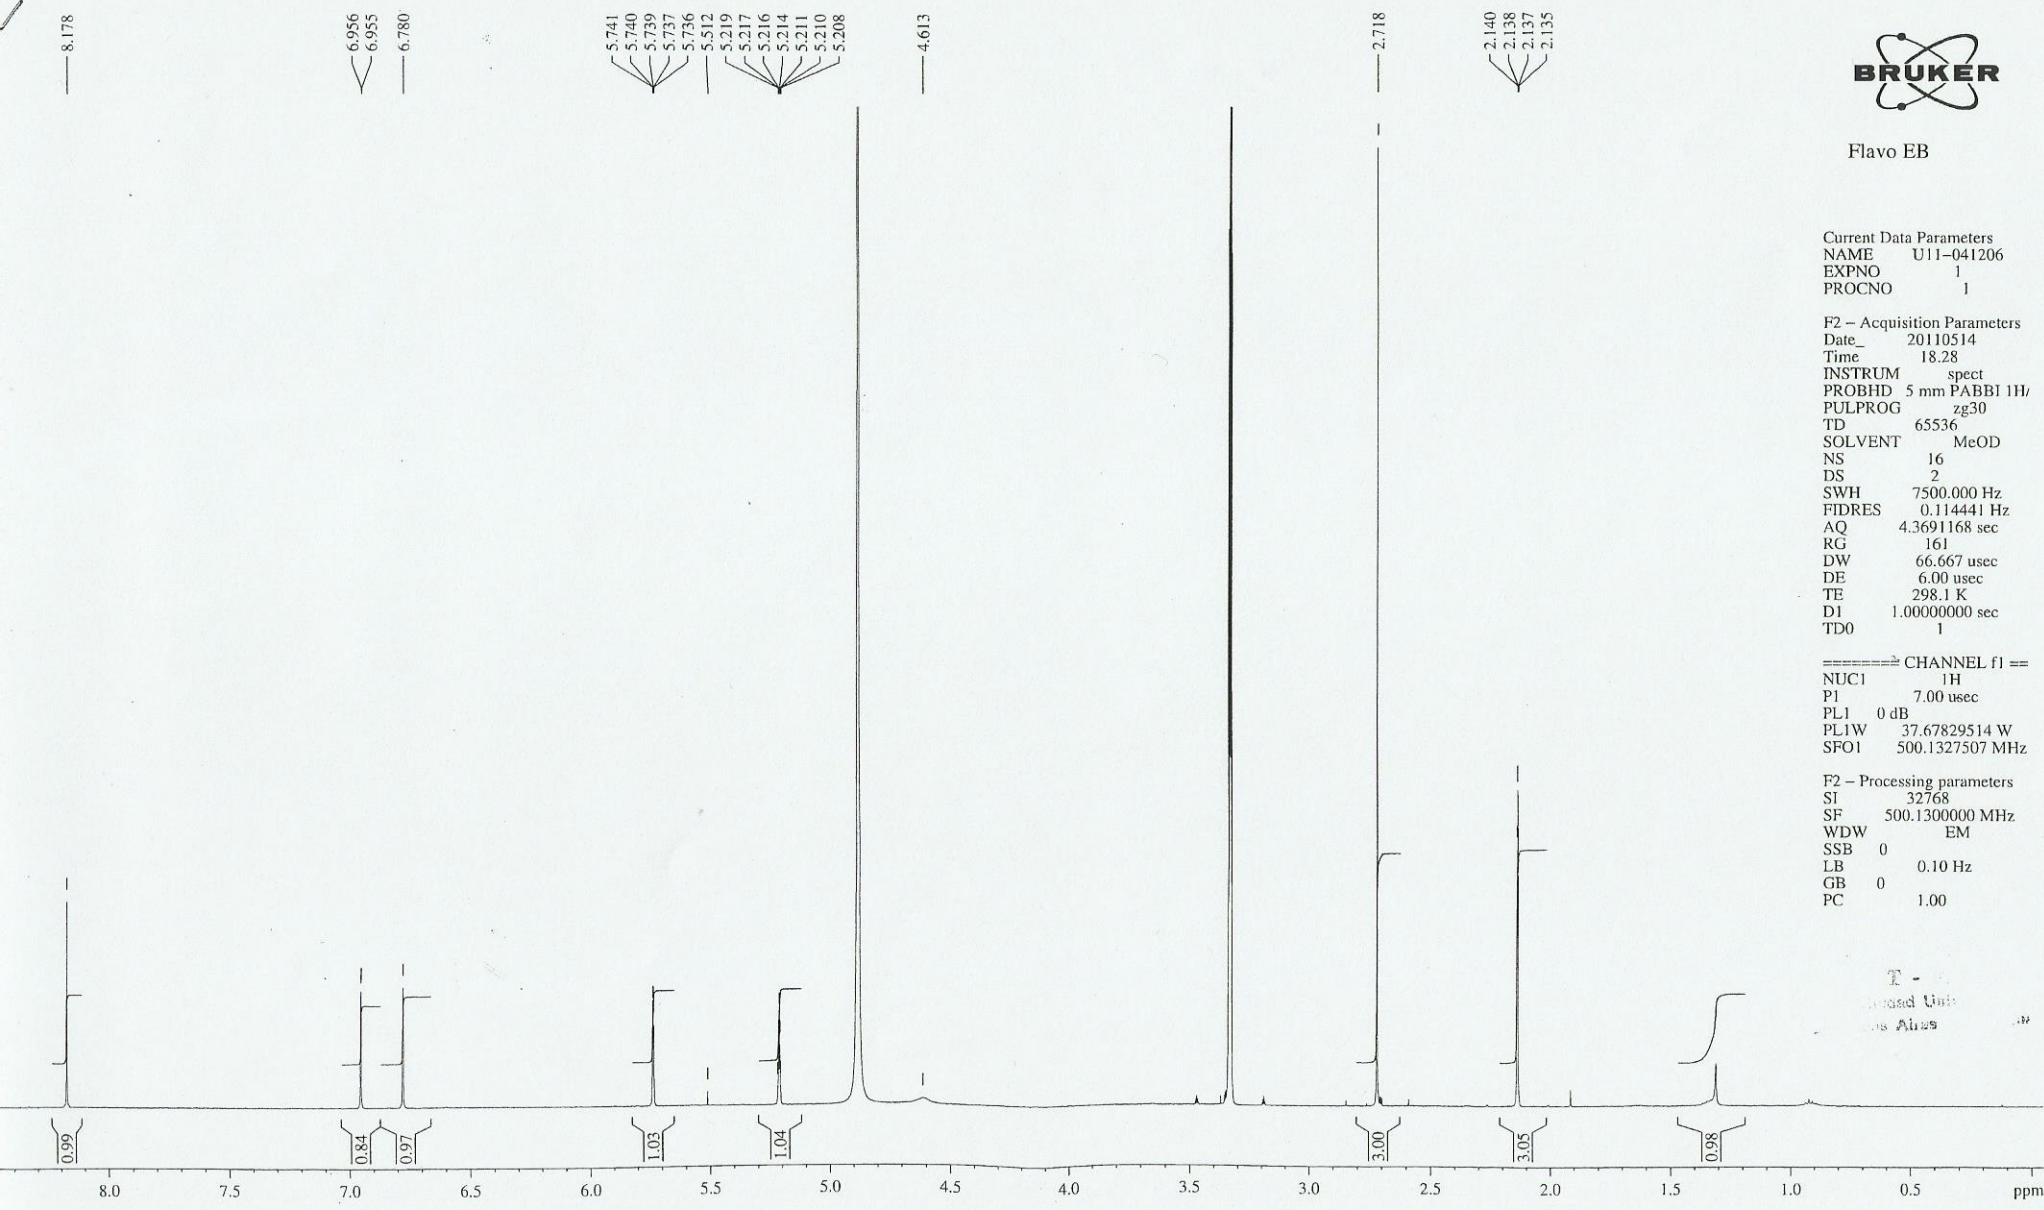

8.178

6.956  
6.955  
6.780

5.741  
5.740  
5.739  
5.737  
5.736  
5.512  
5.219  
5.217  
5.216  
5.214  
5.211  
5.210  
5.208

4.613

2.718

2.140  
2.138  
2.137  
2.135

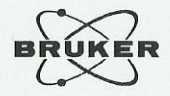

Flavo EB

Current Data Parameters  
 NAME U11-041206  
 EXPNO 1  
 PROCNO 1

F2 - Acquisition Parameters  
 Date\_ 20110514  
 Time 18.28  
 INSTRUM spect  
 PROBHD 5 mm PABBI 1H/  
 PULPROG zg30  
 TD 65536  
 SOLVENT MeOD  
 NS 16  
 DS 2  
 SWH 7500.000 Hz  
 FIDRES 0.114441 Hz  
 AQ 4.3691168 sec  
 RG 161  
 DW 66.667 usec  
 DE 6.00 usec  
 TE 298.1 K  
 D1 1.00000000 sec  
 TD0 1

==== CHANNEL f1 ==  
 NUC1 1H  
 P1 7.00 usec  
 PL1 0 dB  
 PL1W 37.67829514 W  
 SFO1 500.1327507 MHz

F2 - Processing parameters  
 SI 32768  
 SF 500.1300000 MHz  
 WDW EM  
 SSB 0  
 LB 0.10 Hz  
 GB 0  
 PC 1.00

T -  
 1000 MHz  
 100 MHz
