# Supplementary material for: Antipoliovirus Activity of the Organic Extract ofEupatorium buniifolium: Isolation of Euparin as an Active Compound
Source: Hindawi journal article supplement (doi:10.1155/2013/402364), 2013-01-01

204.60

161.24  
159.49  
157.64

132.45

124.27  
121.91

116.79  
112.23

102.54  
98.24

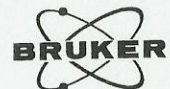

Flavo EB

Current Data Parameters  
NAME U11-041206  
EXPNO 5  
PROCNO 1

F2 - Acquisition Parameters  
Date\_ 2011-05-14  
Time 21.23  
INSTRUM Avance 500  
PROBHD 5 mm PABBI 1H/  
PULPROG zgpg45  
TD 65536  
SOLVENT MeOD  
NS 110360  
DS 4  
SWH 29761.904 Hz  
FIDRES 0.454131 Hz  
AQ 1.1010548 sec  
RG 1440  
DW 16.800 usec  
DE 8.00 usec  
TE 298.9 K  
D1 0.10000000 sec  
D11 0.03000000 sec  
TD0 15

==== CHANNEL f1 ====  
NUC1 13C  
P1 16.00 usec  
PL1 -1.00 dB  
PL1W 63.24555206 W  
SFO1 125.7703640 MHz

==== CHANNEL f2 ====  
CPDPRG2 waltz16  
NUC2 1H  
PCPD2 80.00 usec  
PL2 0 dB  
PL12 21.16 dB  
PL13 120.00 dB  
PL2W 37.67829514 W  
PL12W 0.28846377 W  
PL13W 0 W  
SFO2 500.1320000 MHz

F2 - Processing parameters  
SI 32768  
SF 125.7577890 MHz  
WDW EM  
SSB 0  
LB 1.00 Hz

25.59

17.85

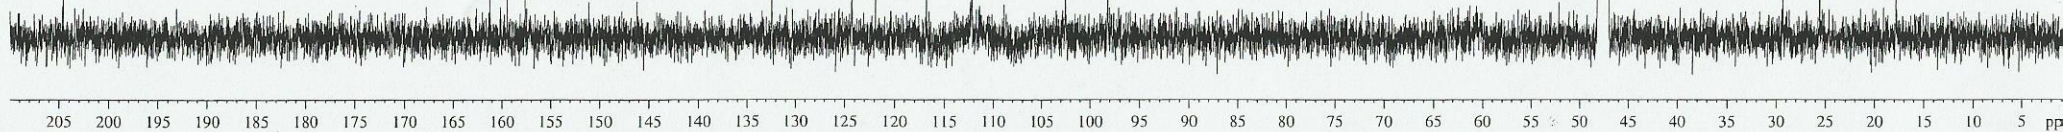

Supplement: f3 [file 402364.f3.pdf]
